# Supplementary material for: Isoform-specific functions of PPARγ in gene regulation and metabolism
Source: PubMed Central journal article supplement — Genes Dev. 2022 Mar 1;36(5-6):300–12. doi: 10.1101/gad.349232.121 (PMC8973844; doi:10.1101/gad.349232.121), 2022-03-01
Supplement: supp_gad.349232.121_Supplemental_Data.pdf [file supp_gad.349232.121_Supplemental_Data.pdf]

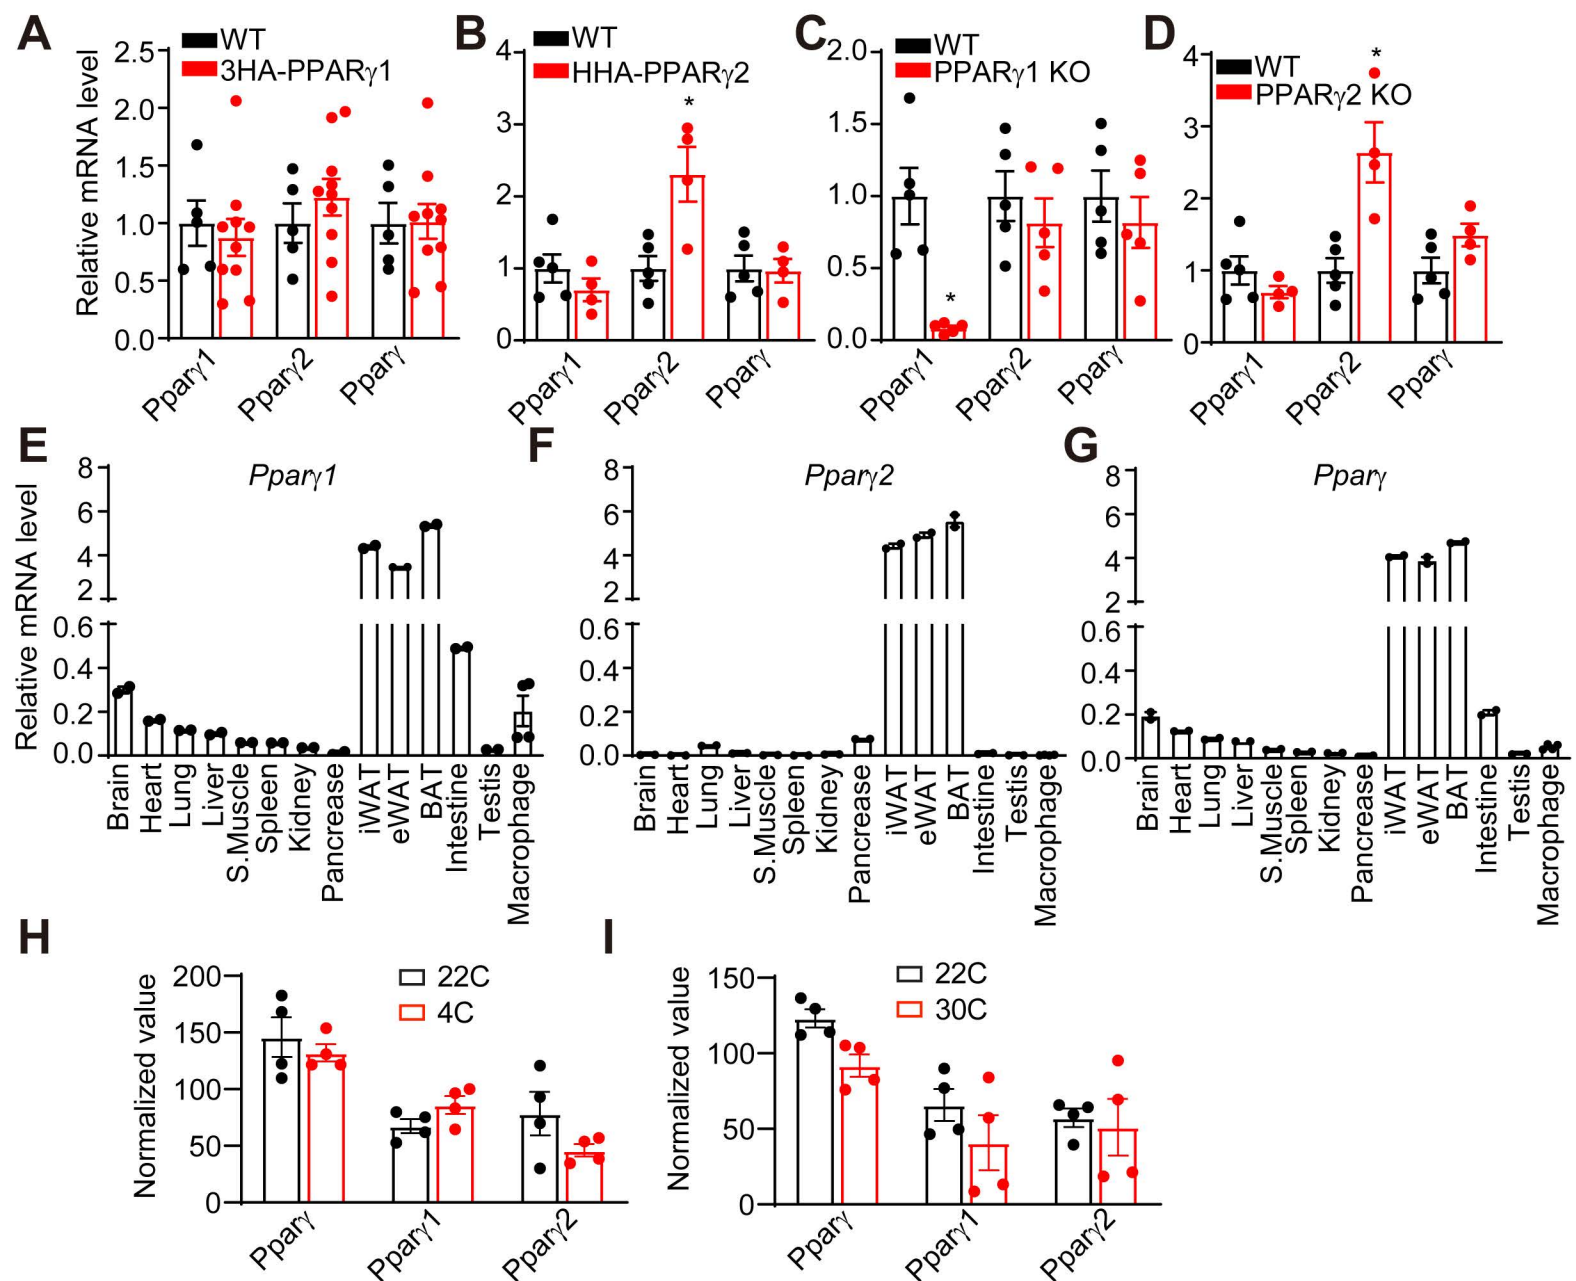

**Figure S1. PPAR $\gamma$ 1 and PPAR $\gamma$ 2 expression levels in various mouse models. (A-D).** mRNA expression of *PPAR $\gamma$ 1*, *PPAR $\gamma$ 2* and total *PPAR $\gamma$*  in iWAT of 3HA-PPAR $\gamma$ 1 (A), HHA-PPAR $\gamma$ 2 (B), PPAR $\gamma$ 1 KO (C) and PPAR $\gamma$ 2 KO mice (D) in iWAT, normalized to *Arbp*; WT was set to 1, as measured by qRT-PCR.  $n = 4-10$  per group. **(E-G).** mRNA expression of *PPAR $\gamma$ 1* (E), *PPAR $\gamma$ 2* (F) and total *PPAR $\gamma$*  (G) in various tissues.  $n = 2-4$  per group. Data are expressed as mean  $\pm$  SEM. \* $p < 0.05$  (Student's  $t$  test). **(H and I).** mRNA expression of total *PPAR $\gamma$* , *PPAR $\gamma$ 1* and *PPAR $\gamma$ 2* under 4  $^{\circ}\text{C}$  (H) and 30  $^{\circ}\text{C}$  (I).  $n = 4$  per group. Data are expressed as mean  $\pm$  SEM, as measured by RNA-seq.

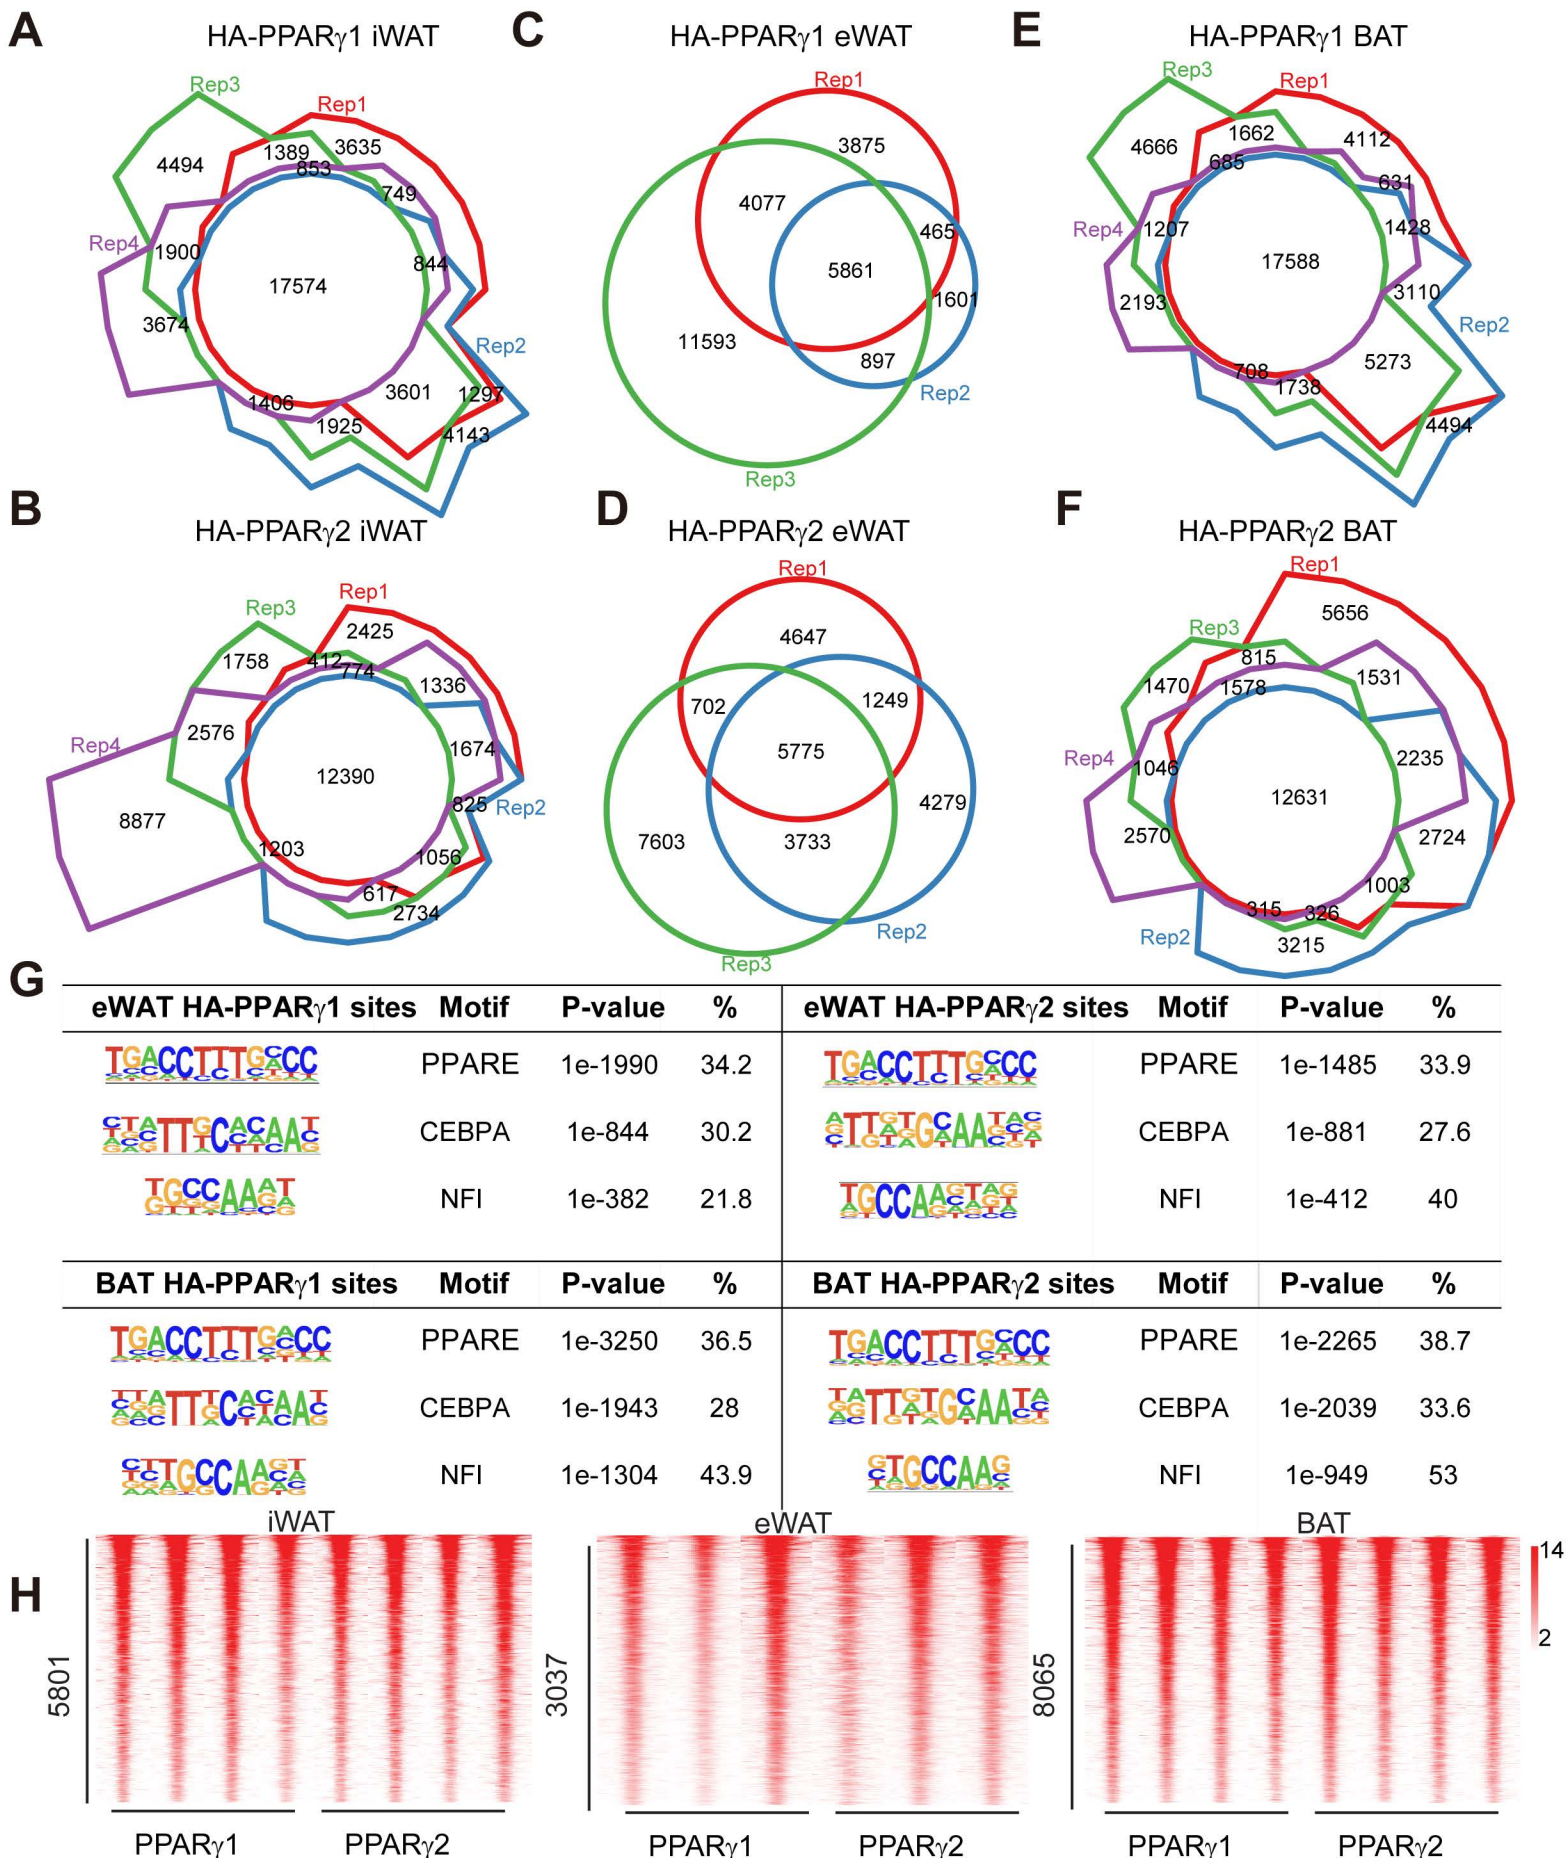

**Figure S2. Characterization of the cistromes of PPAR $\gamma$ 1 and PPAR $\gamma$ 2. (A-F).** Venn diagram showing the overlap of the cistromes of HA-PPAR $\gamma$ 1 (A, C, and E) and HA-PPAR $\gamma$ 2 from each biological replicate in three adipose depots (B, D, and F). **(G).** Top motifs enriched in PPAR $\gamma$ 1 and PPAR $\gamma$ 2 binding sites using Homer de novo motif analysis. **(H).** Heat map shows PPAR $\gamma$ 1- or PPAR $\gamma$ 2 common sites in three or four biological replicates from three adipose depots.

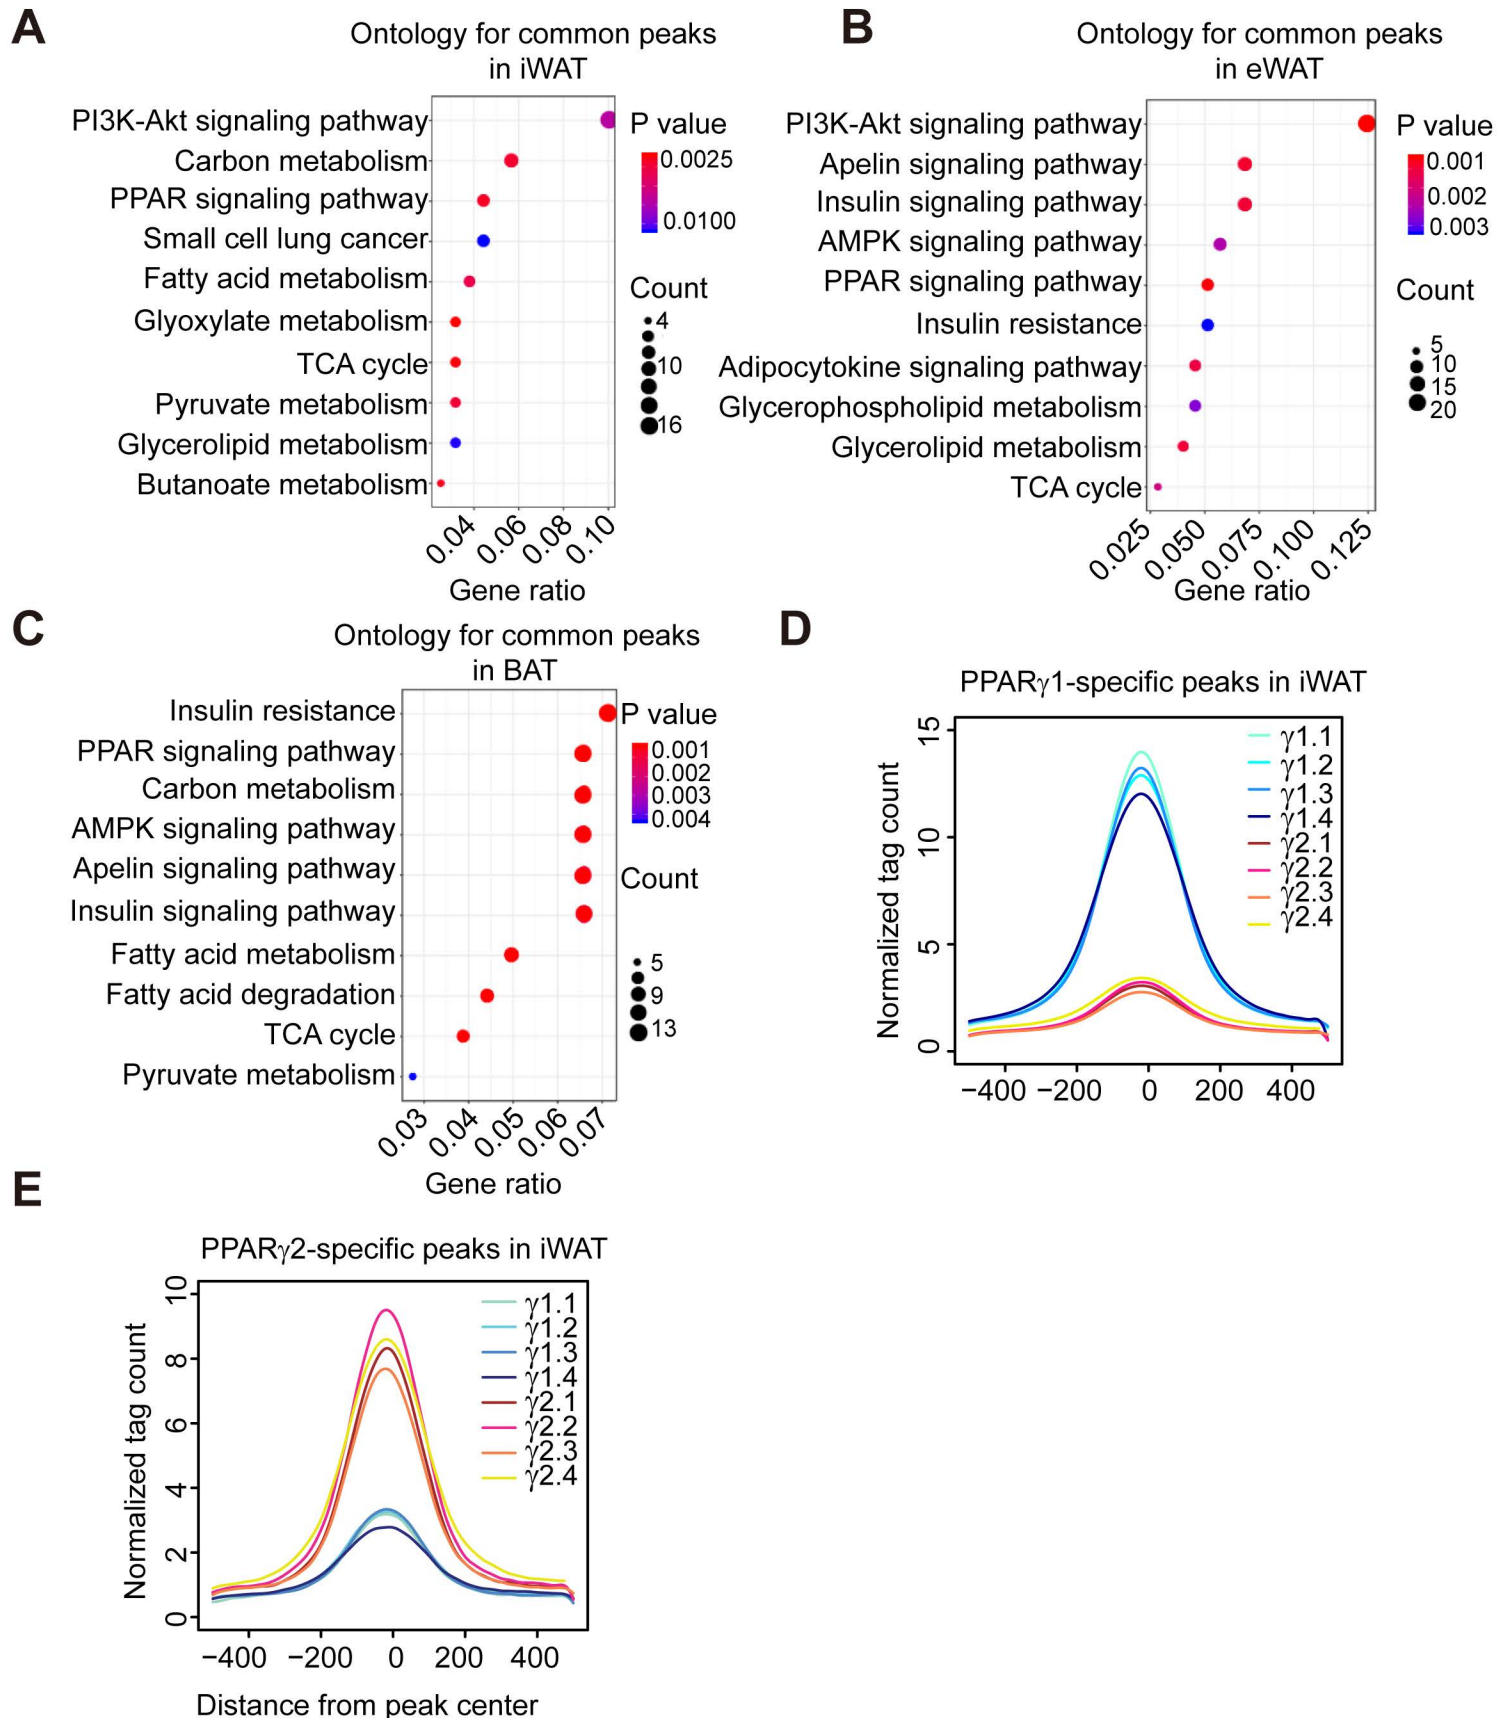

**Figure S3. Annotation of PPAR $\gamma$ 1- and PPAR $\gamma$ 2-specific peaks. (A-C).** Gene ontology for the nearest genes of common PPAR $\gamma$  binding sites that are detected similarly in PPAR $\gamma$ 1 and PPAR $\gamma$ 2 cistromes in iWAT (A), eWAT (B) and BAT (C). **(D).** For PPAR $\gamma$ 1-specific peaks in iWAT, the average binding profiles are shown in 1 kb windows. **(E).** For PPAR $\gamma$ 2-specific peaks in iWAT, the average binding profiles are shown in 1 kb windows.

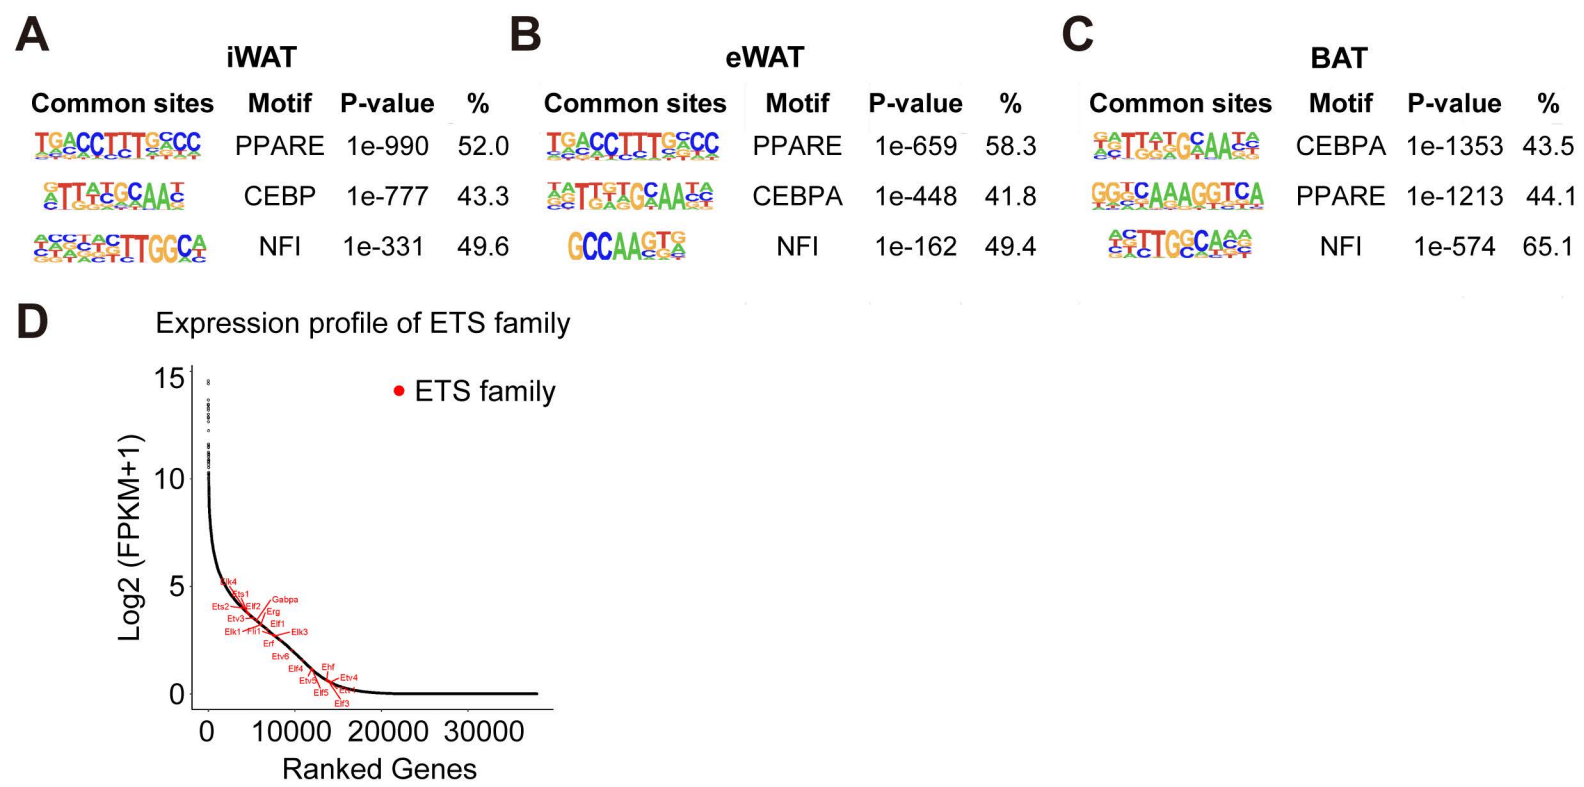

**Figure S4. De novo motif analysis of common PPAR $\gamma$  binding sites in three adipose depots. (A-C).** De novo motif analysis of common PPAR $\gamma$  binding sites in iWAT (A), eWAT (B) and BAT (C). **(D).** The expression profile of ETS family members in iWAT.

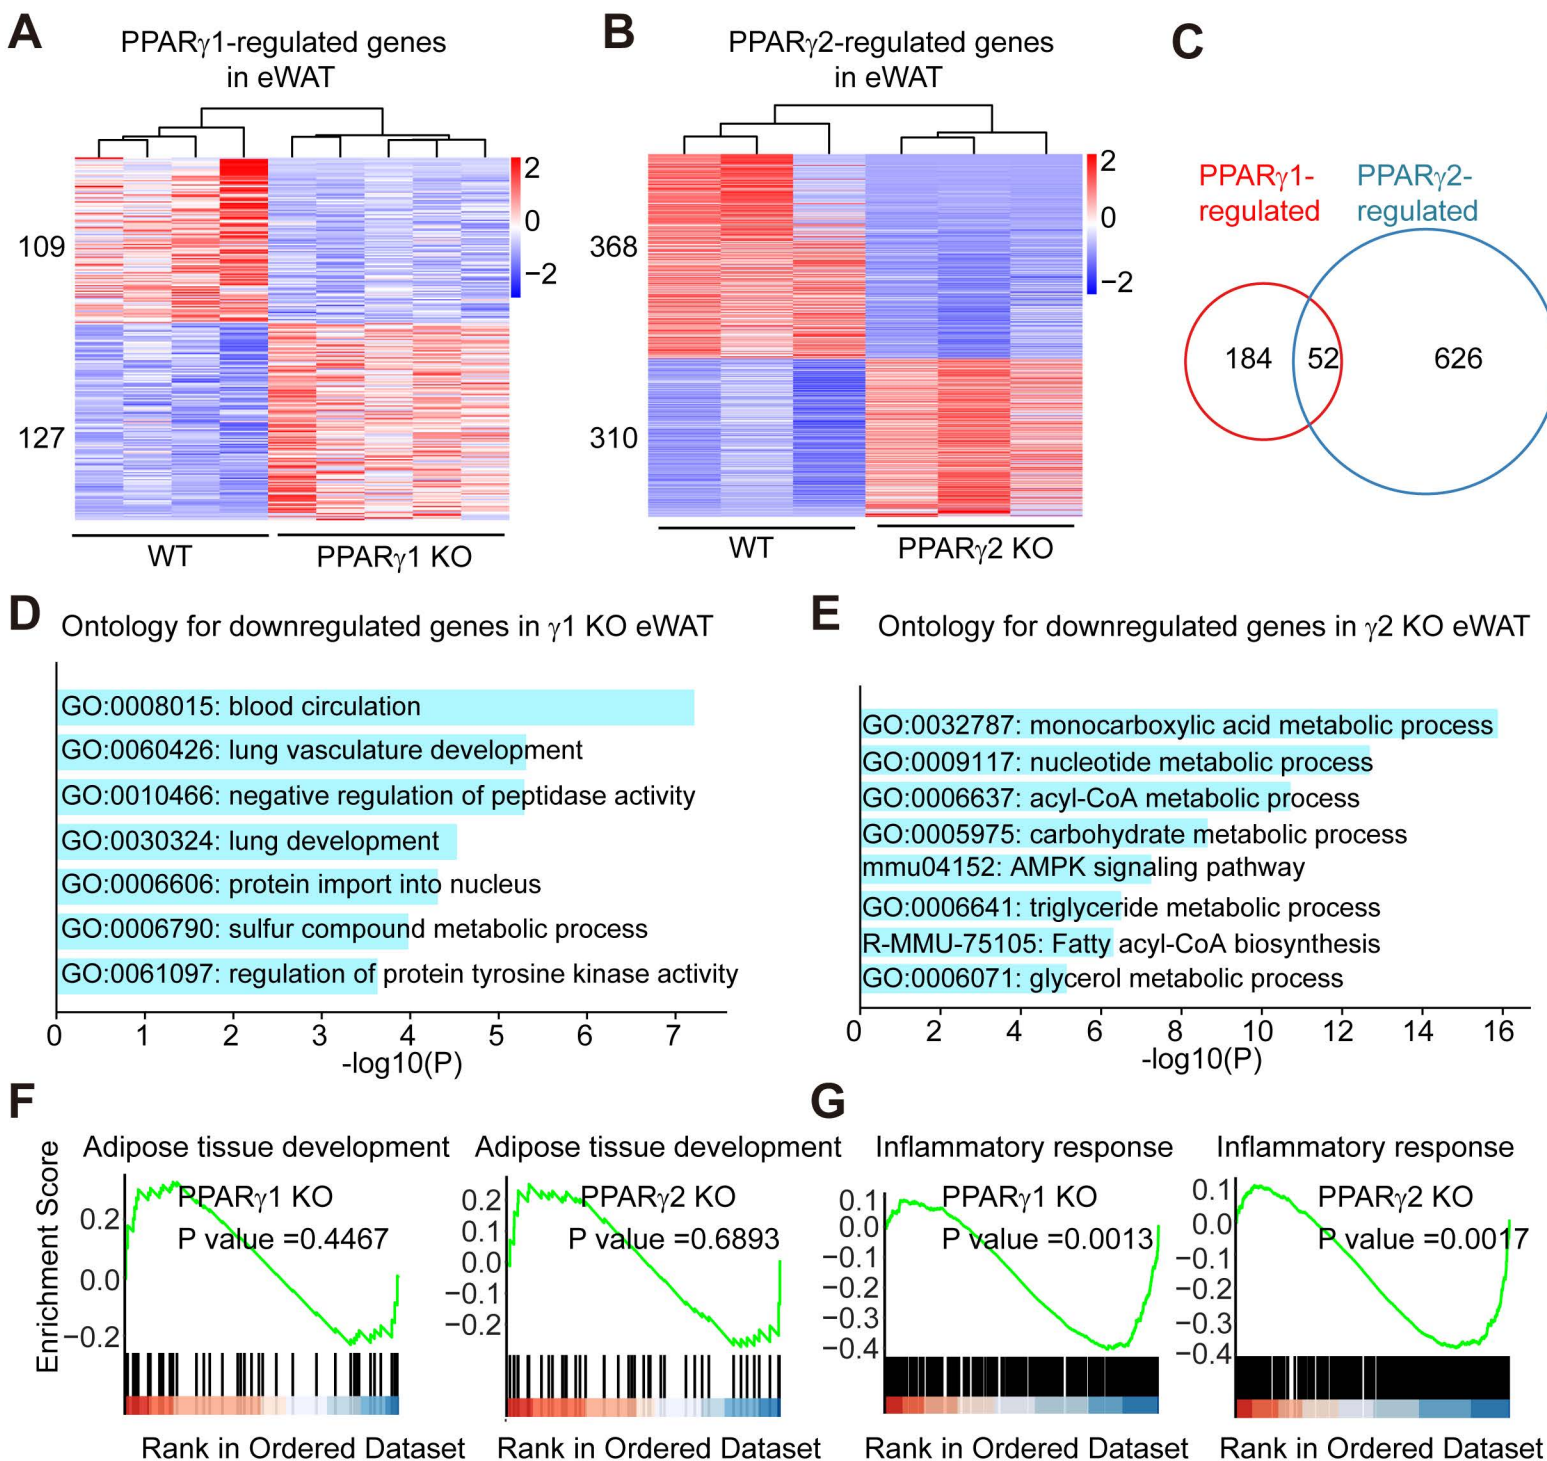

**Figure S5. PPAR $\gamma$ 1 and PPAR $\gamma$ 2 regulate differential set of genes in eWAT. (A and B).** Heatmap of the genes differentially expressed in PPAR $\gamma$ 1 KO (A) and PPAR $\gamma$ 2 KO mice (B) in eWAT. Three or four biological replicates, DE cutoff:  $|FC| > 1.5$ ,  $FDR < 0.01$ . **(C).** Venn diagram showing the comparison of the PPAR $\gamma$ 1- and PPAR $\gamma$ 2-regulated genes in eWAT. **(D and E).** Gene ontology analysis of genes differentially expressed in PPAR $\gamma$ 1 KO (D) and PPAR $\gamma$ 2 KO mice (E). **(F and G).** GSEA analysis showing the no enrichment of adipose tissue development pathway for PPAR $\gamma$ 1-regulated genes and PPAR $\gamma$ 2-regulated genes (F), but significant enrichment of inflammatory response pathway for both PPAR $\gamma$ 1-regulated genes and PPAR $\gamma$ 2-regulated genes in BAT (G). Genes were ranked by average fold change in KO vs WT.

PPAR $\gamma$ 1-specific peaks and PPAR $\gamma$ 1-specific genes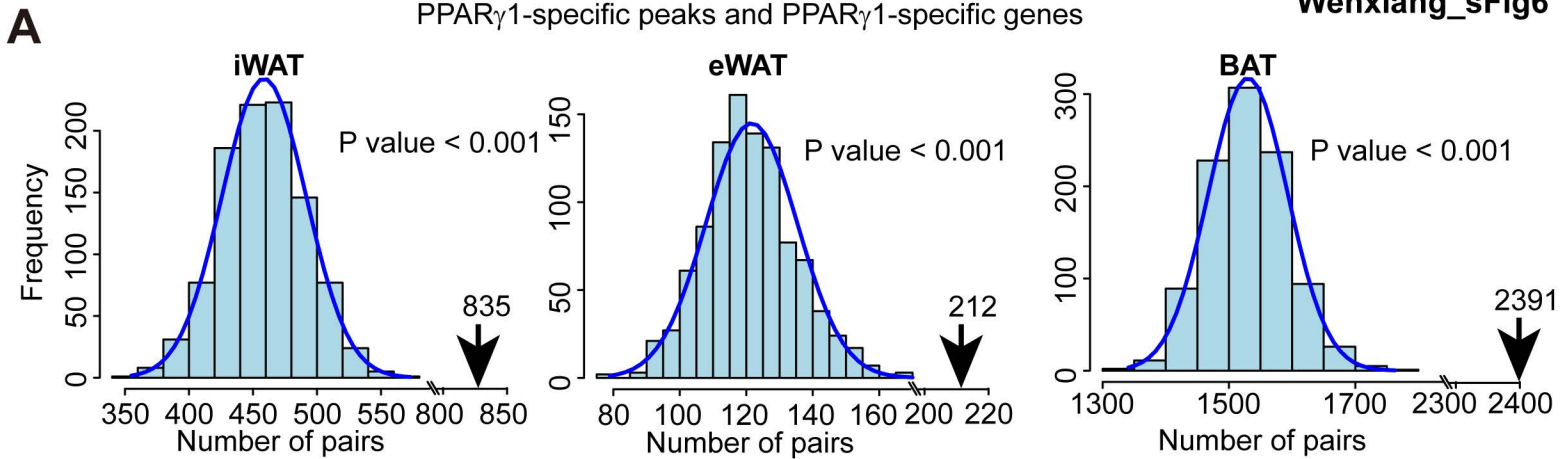PPAR $\gamma$ 2-specific peaks and PPAR $\gamma$ 2-specific genes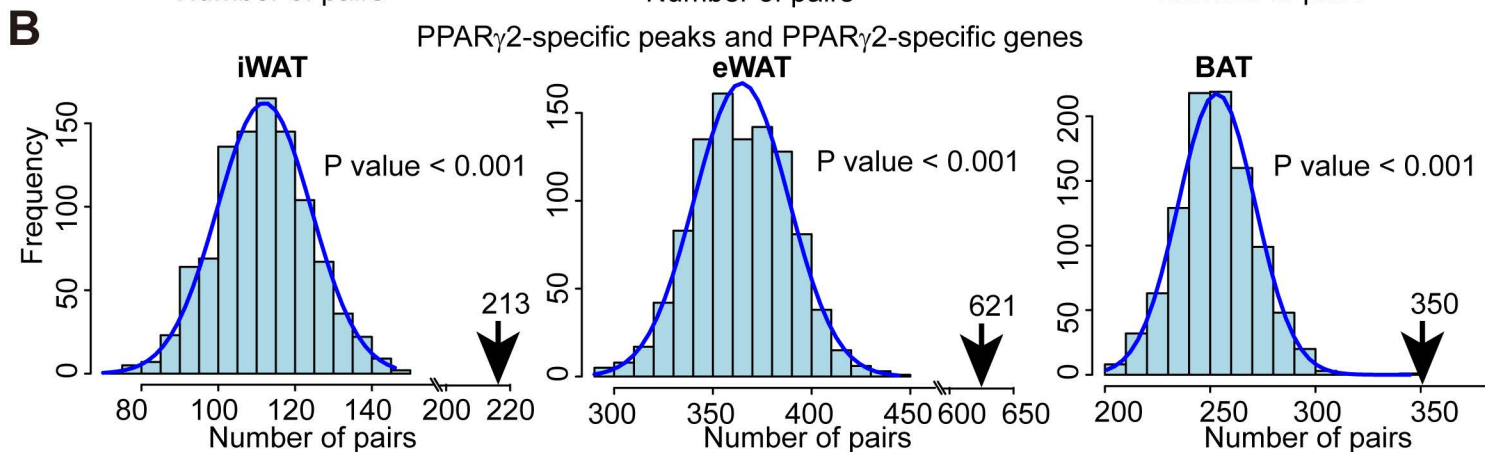

**C**  $\gamma$ 1-specific regulation and  $\gamma$ 1-specific peaks  
30kb

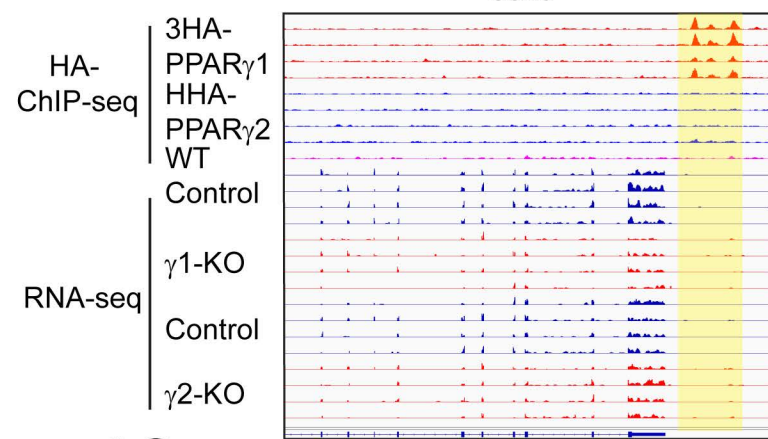

**D**  $\gamma$ 2-specific regulation and  $\gamma$ 2-specific peaks  
88kb

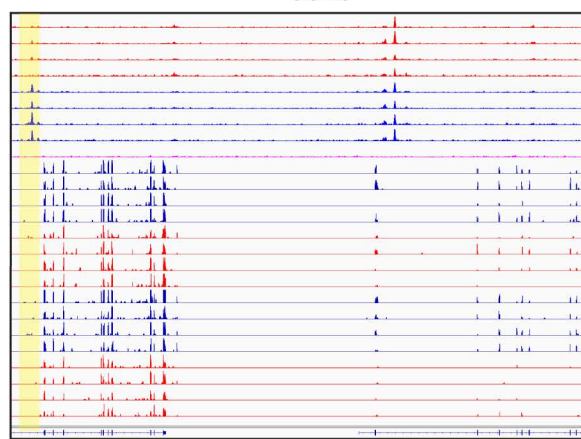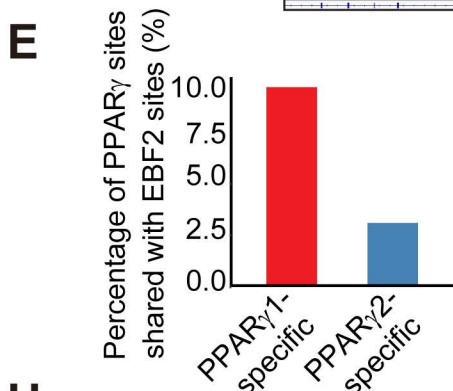

**F** *Slc1a1* HDAC3

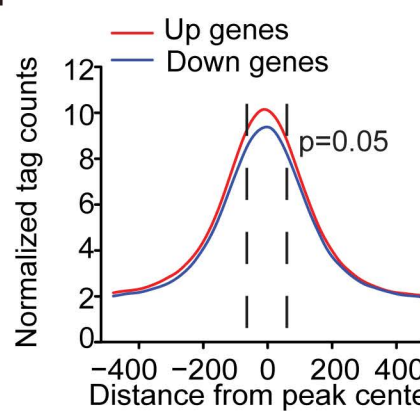

**G** NCoR *Slc6a13*

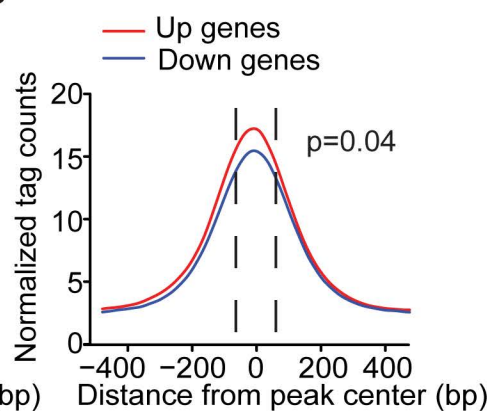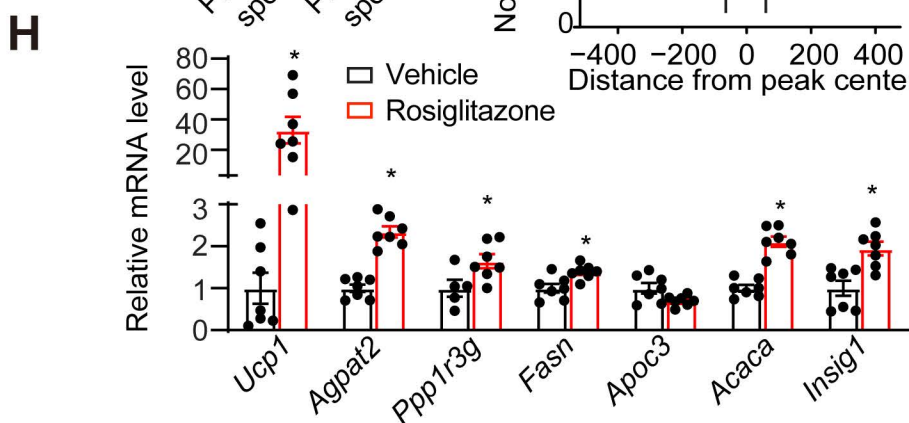

**Figure S6. Differential genomic binding of PPAR $\gamma$ 1 and PPAR $\gamma$ 2 drives the differential regulation of genes. (A).** PPAR $\gamma$ 1-specific regulated genes are enriched in PPAR $\gamma$ 1-specific peaks in iWAT, eWAT and BAT based on a permutation test. The pairs of PPAR $\gamma$ 1-specific regulated genes that have PPAR $\gamma$ 1-specific binding sites within 100 kb is indicated with a black arrow. The p values were calculated by permutation test. **(B).** PPAR $\gamma$ 2-specific regulated genes are enriched in PPAR $\gamma$ 2-specific peaks in iWAT, eWAT and BAT based on a random test. The pairs of PPAR $\gamma$ 2-specific regulated genes that have PPAR $\gamma$ 2-specific binding sites within 100 kb is indicated with a black arrow. The p values were calculated by permutation test. **(C and D).** Visualization of  $\gamma$ 1-specific binding (top) and  $\gamma$ 1-specific gene regulation (bottom) at *Slc1a1* locus in 4 biological replicates (C), as well as  $\gamma$ 2-specific binding (top) and  $\gamma$ 2-specific gene regulation (bottom) at *Slc6a13* locus (D). Yellow box indicates genomic regions with isoform-specific PPAR $\gamma$  binding. **(E).** Percentage of PPAR $\gamma$ 1- and PPAR $\gamma$ 2-specific binding sites shared with EBF2 binding sites. **(F and G).** The average peak intensities of HDAC3 (F) and NCoR (G) peaks overlapped with  $\gamma$ 1-specific peaks that associate with  $\gamma$ 1-specific regulated genes. \*p < 0.05 (Student's t test). **(H).** mRNA expression of basally repressed genes by PPAR $\gamma$ 1 in iWAT under rosiglitazone treatment, normalized to Arbp; Vehicle was set to 1, as measured by qRT-PCR. Data are expressed as mean  $\pm$  SEM. \*p < 0.05 (Student's t test).

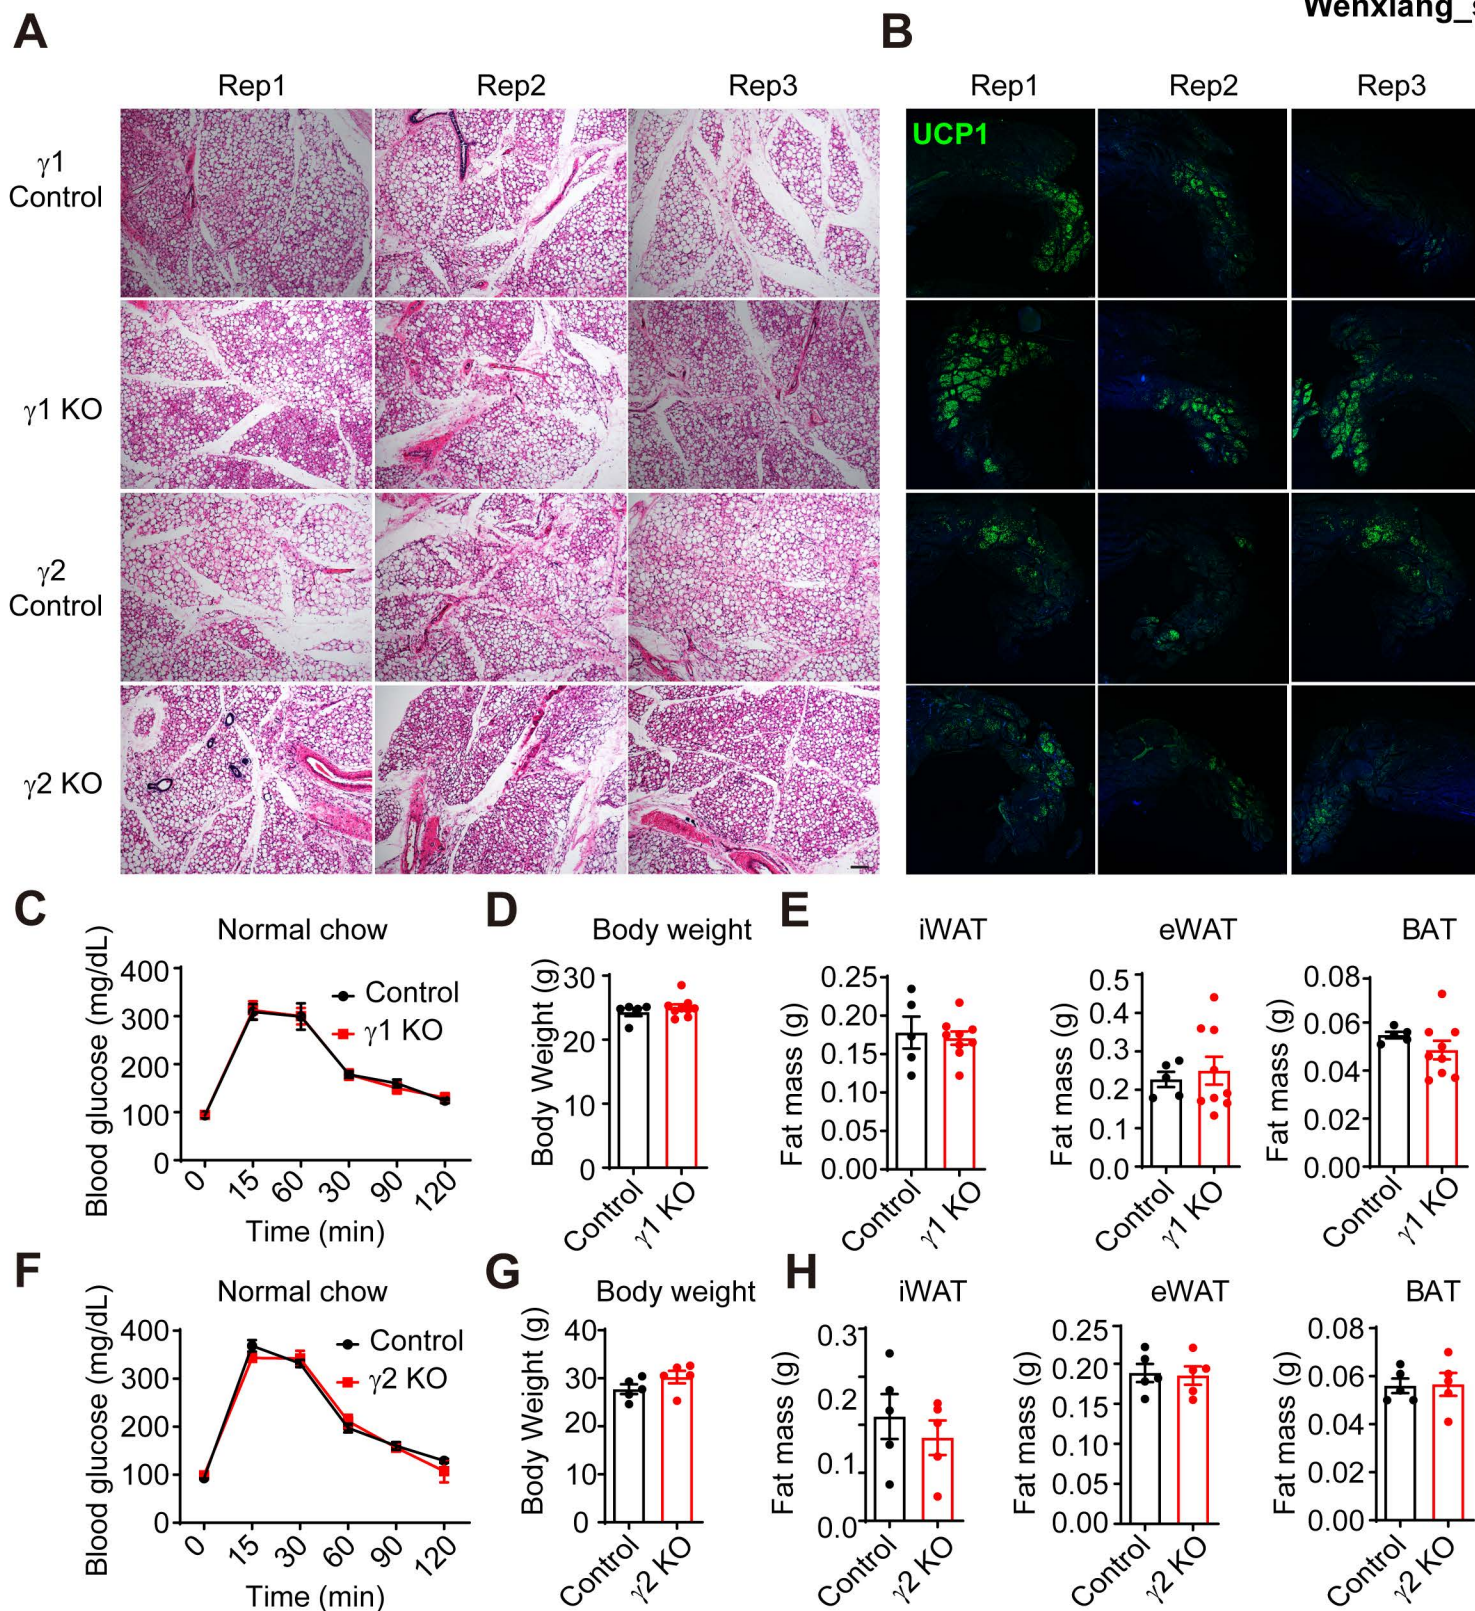

**Figure S7. Normal metabolic phenotype of PPAR $\gamma$ 1 KO and PPAR $\gamma$ 2 KO mice on normal chow diet. (A and B).** H&E staining (A) and Ucp1 staining (B) of iWAT from PPAR $\gamma$ 1 KO and PPAR $\gamma$ 2 KO mice and their control littermates housing at 4 °C for 5 days.  $n = 3$  per group. Scale bar, 50  $\mu$ m. **(C and F).** Intraperitoneal glucose tolerance test of PPAR $\gamma$ 1 KO (C) and PPAR $\gamma$ 2 KO mice (F) and their control littermates under normal chow diets.  $n = 4-9$  per group. **(D and G).** Body weight of PPAR $\gamma$ 1 KO (D) and PPAR $\gamma$ 2 KO mice (G) and their control littermates on normal chow diet.  $n = 5-9$  per group. **(E and H).** iWAT, eWAT and BAT weights from PPAR $\gamma$ 1 KO (E) and PPAR $\gamma$ 2 KO mice (H) and their control littermates on normal chow diet.  $n = 5-9$  per group. Data are expressed as mean  $\pm$  SEM.



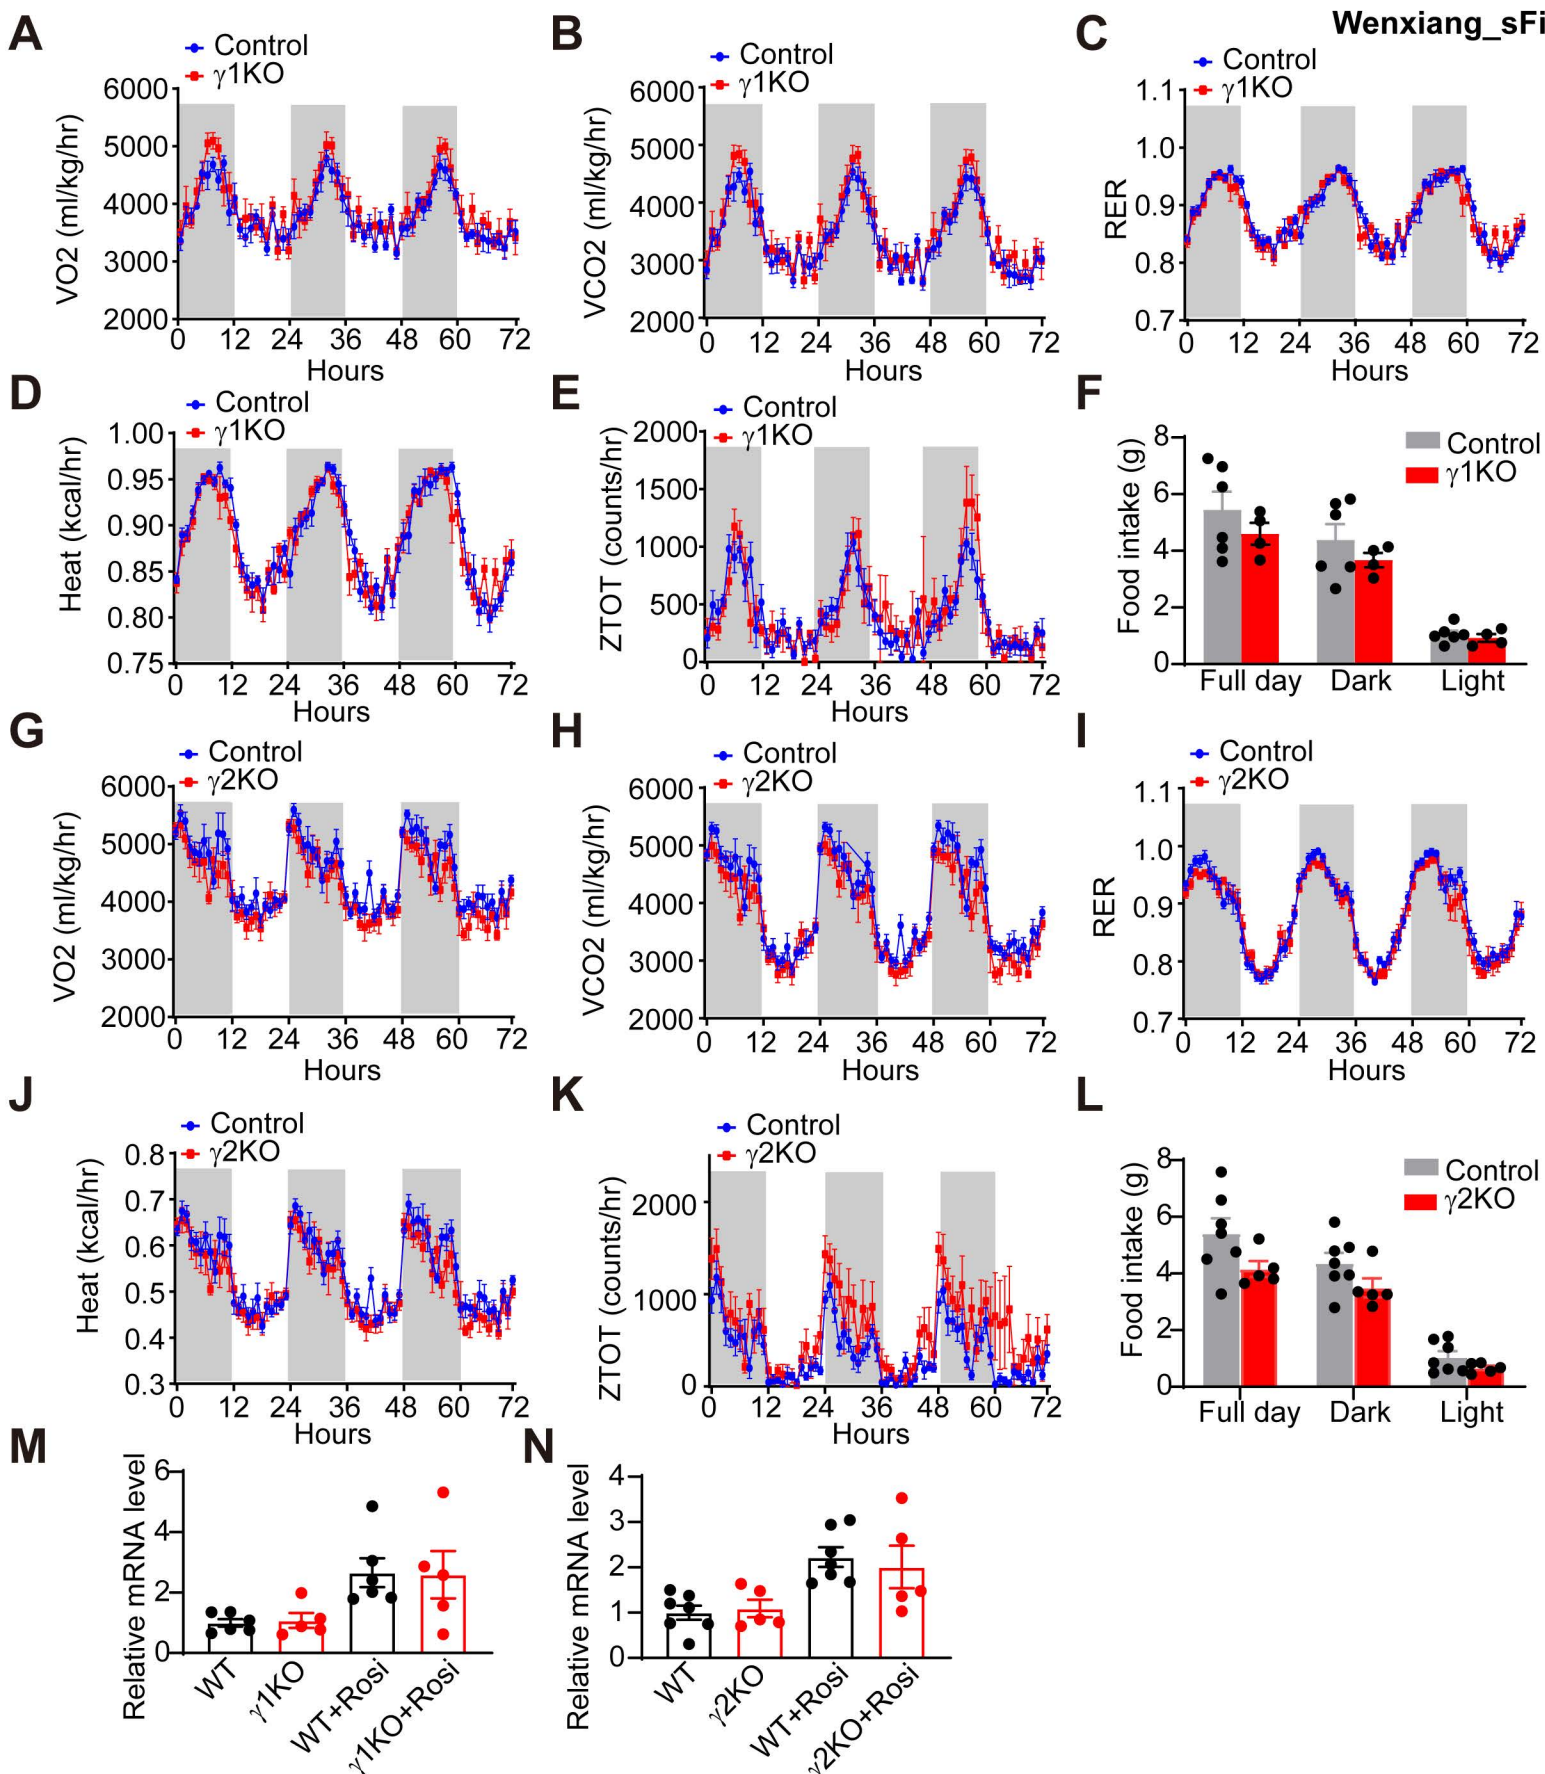

**Figure S8. PPAR $\gamma$ 1 and PPAR $\gamma$ 2 deletions do not induce metabolic syndrome on normal chow diet. (A and G).** Oxygen consumption (VO<sub>2</sub>) in PPAR $\gamma$ 1 KO (A) and PPAR $\gamma$ 2 KO mice (G) and their control littermates under NCD. **(B and H).** Carbon dioxide production (VCO<sub>2</sub>) in PPAR $\gamma$ 1 KO (B) and PPAR $\gamma$ 2 KO mice (H) and their control littermates on NCD. **(C and I).** Respiratory Exchange Ratio (RER) in PPAR $\gamma$ 1 KO (C) and PPAR $\gamma$ 2 KO mice (I) and their control littermates on NCD. **(D and J).** Heat production in PPAR $\gamma$ 1 KO (D) and PPAR $\gamma$ 2 KO mice (J) and their control littermates on NCD. **(E and K).** Locomotor activity of PPAR $\gamma$ 1 KO (E) and PPAR $\gamma$ 2 KO mice (K) and their control littermates on NCD. **(F and L).** Food intake of PPAR $\gamma$ 1 KO (F) and PPAR $\gamma$ 2 KO mice (L) and their control littermates on NCD. **(M and N).** mRNA expression of GK in PPAR $\gamma$ 1 KO (M) and PPAR $\gamma$ 2 KO mice (N) and their control littermates under rosiglitazone treatment, normalized to Arbp; WT mice was set to 1, as measured by qRT-PCR. Data are expressed as mean  $\pm$  SEM.

**Table S1. Primers used in this study.**

| <b>Primer for RT-qPCR</b> |                          |                           |
|---------------------------|--------------------------|---------------------------|
| <b>Primers</b>            | <b>Forward (5'-3')</b>   | <b>Reverse (5'-3')</b>    |
| Arbp                      | TCCAGGCTTTGGGCATCA       | CTTTATCAGCTGCACATCACTCAGA |
| Ppar $\gamma$ 1           | AGAAGCGGTGAACCACTGATATTC | AGAGGTCCACAGAGCTGATTCC    |
| Ppar $\gamma$ 2           | TGGGTGAAACTCTGGGAGATTC   | GAGAGGTCCACAGAGCTGATTCC   |
| Ppar $\gamma$             | GACCTGAAGCTCCAAGAATACC   | ACAGACTCGGCACTCAATG       |
| Ucp1                      | TCAGGATTGGCCTCTACGAC     | TGCCACACCTCCAGTCATTA      |
| GK                        | CGGAGACCAGCCGTGTAAAG     | GTCCACTGCTCCCACCAATG      |
| Agpat2                    | CAGCCAGGTTCTACGCCAAG     | TGATGCTCATGTTATCCACGGT    |
| Ppp1r3g                   | TGGCAACGATGCCTGATCC      | CCACTCCGTGAAAGTGTAGC      |
| Fasn                      | TACAGGAGTTCTGGGCCAAC     | GACCGCTTGGGTAATCCATA      |
| Apoc3                     | TACAGGGCTACATGGAACAAGC   | CAGGGATCTGAAGTGATTGTCC    |
| Acaca                     | CTTCCTGACAAACGAGTCTGG    | CTGCCGAAACATCTCTGGGA      |
| Insig1                    | CACGACCACGTCTGGAATAT     | TGAGAAGAGCACTAGGCTCCG     |
